# Supplementary material
Source: PubMed Central journal article supplement (PMC3256334)

Supplementary Figure 1. Scatterplots of representative CpG sites associated with GA with regression lines.

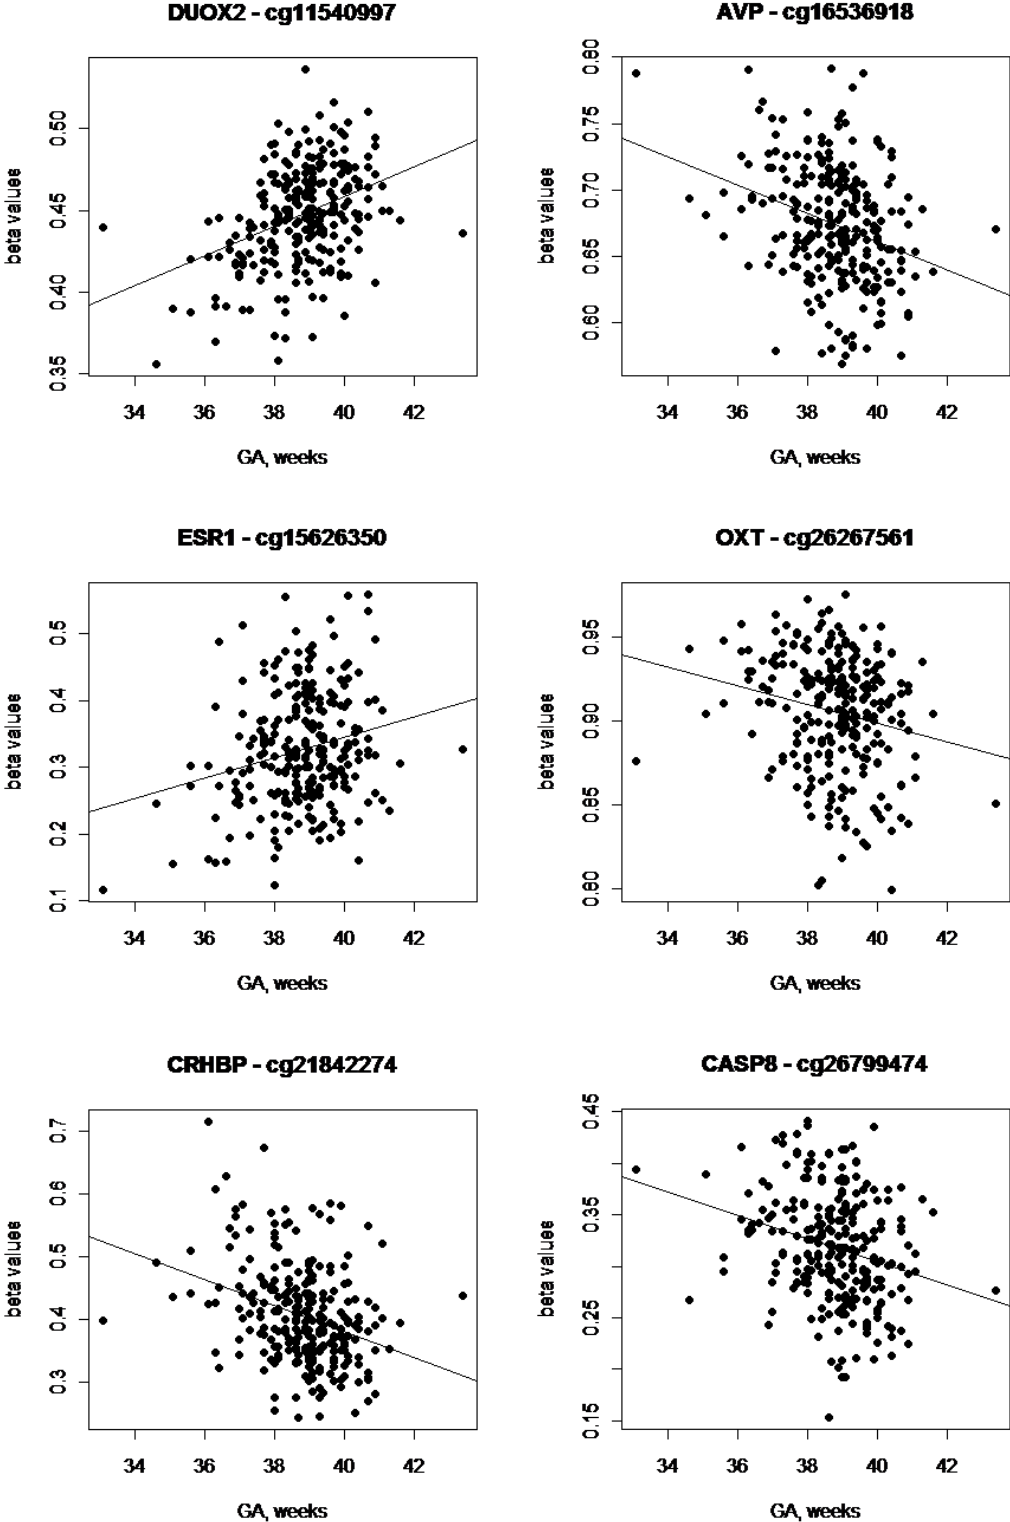

Supplementary Figure 2. Heat map of  $\beta$  values from subjects with the lowest (red; N=10) and highest (blue; N=10) gestational ages from the discovery cohort.

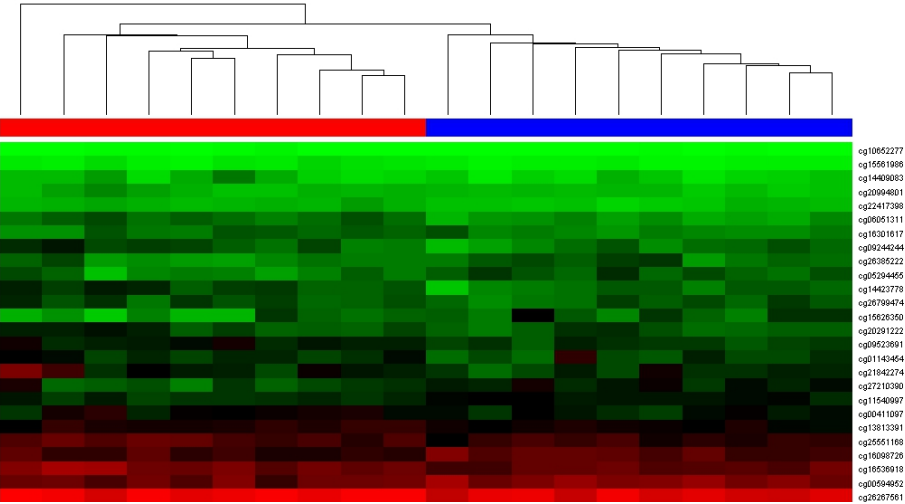

Supplement: epi0612_1498SD1.pdf [file epi0612_1498SD1.pdf]
